# Supplementary material for: Pan-Genome of the Genus Streptomyces and Prioritization of Biosynthetic Gene Clusters With Potential to Produce Antibiotic Compounds
Source: Front Microbiol. 2021 Sep 28;12:677558. doi: 10.3389/fmicb.2021.677558 (PMC8510958; doi:10.3389/fmicb.2021.677558)
Supplement: Supplementary file 1 [file Data_Sheet_1.XLSX]

## Sheet: Sheet_1
Genome identifier	Organism name	Habitat/host	Total sequence length (bp)	Number of rRNA	Number of tRNA	Number of proteins	Genomic G+C %	Number of Chromosomes	Number of plasmids	CRISPR count (Integrated Microbial Genomes and Microbiomes)	BGC region (antiSMASH)	BGC	Core	Known resistance	NCBI BioProject Accession	RefSeq assembly accession	Assembly Method	Genome Coverage	Sequencing Technology	URL for Data Download
GID89	Streptomyces actuosus ATCC 25421	soil	8145579	18	73	7070	72.5	1	0	4	26	36	36	5	PRJNA474280	GCF_003208035.1	Celera Assembler v. 8.3; FALCON v. 0.3.0	40.0x	PacBio	https://ftp.ncbi.nlm.nih.gov/genomes/refseq/bacteria/Streptomyces_actuosus/all_assembly_versions/GCF_003208035.1_ASM320803v1
GID15	Streptomyces albidoflavus J1074	soil	6841649	21	66	5778	73.1	1	0	12	22	29	27	1	PRJNA180996	GCF_000359525.1	MIRA v. 3.4	___	454; Illumina; Sanger	https://ftp.ncbi.nlm.nih.gov/genomes/refseq/bacteria/Streptomyces_albidoflavus/all_assembly_versions/GCF_000359525.1_ASM35952v1
GID40	Streptomyces albidoflavus SM254	soil	7170504	21	69	6035	73.1	1	0	11	21	28	29	1	PRJNA295319	GCF_001577385.1	HGAP v. 3	250x	PacBio	https://ftp.ncbi.nlm.nih.gov/genomes/refseq/bacteria/Streptomyces_albidoflavus/all_assembly_versions/GCF_001577385.1_ASM157738v1
GID70	Streptomyces albireticuli MDJK11	rhizosphere	8144417	21	79	6566	72.5	1	0		40	69	26	9	PRJNA383953	GCF_002192455.1	Celera Assembler v. 2.3	88.0x	PacBio	https://ftp.ncbi.nlm.nih.gov/genomes/refseq/bacteria/Streptomyces_albireticuli/all_assembly_versions/GCF_002192455.1_ASM219245v1
GID69	Streptomyces alboflavus MDJK44	rhizosphere	9967549	18	73	7628	71.7	1	2	9	29	41	22	2	PRJNA388234	GCF_002189675.2	Celera Assembler v. 2.3	102.0x	PacBio	https://ftp.ncbi.nlm.nih.gov/genomes/refseq/bacteria/Streptomyces_alboflavus/all_assembly_versions/GCF_002189675.2_ASM218967v2
GID28	Streptomyces albulus CK-15	soil	9336218	21	74	7696	72.2	1	0	4	37	55	31	4	PRJNA271725	GCF_000935185.3	Newbler v 2.3	65.0x	PacBio	https://ftp.ncbi.nlm.nih.gov/genomes/refseq/bacteria/Streptomyces_albulus/all_assembly_versions/GCF_000935185.3_ASM93518v3
GID20	Streptomyces albulus NK660	soil	9372401	21	70	7554	72	1	1	4	38	55	31	4	PRJNA242787	GCF_000695235.1	SMRT Portal v. 2.2.0	80x	454; Illumina; PacBio	https://ftp.ncbi.nlm.nih.gov/genomes/refseq/bacteria/Streptomyces_albulus/all_assembly_versions/GCF_000695235.1_ASM69523v1
GID51	Streptomyces albus BK3-25	soil	8308430	18	70	6491	72.2	1	0	5	35	58	26	10	PRJNA316158	GCF_001753425.1	Newbler v. unspecified	25x	454;Sanger	https://ftp.ncbi.nlm.nih.gov/genomes/refseq/bacteria/Streptomyces_albus/all_assembly_versions/GCF_001753425.1_ASM175342v1
GID25	Streptomyces albus DSM 41398	soil	8384669	18	70	6530	72.2	1	0	5	36	60	26	10	PRJNA271625	GCF_000827005.1	Newbler v. unspecified	26x	454;Sanger	https://ftp.ncbi.nlm.nih.gov/genomes/refseq/bacteria/Streptomyces_albus/all_assembly_versions/GCF_000827005.1_ASM82700v1
GID107	Streptomyces albus ZD11	soil	8317371	18	70	6488	72.2	1	0	5	35	58	26	10	PRJNA481099	GCF_003675345.1	Celera Assembler v. 8.3	180.0x	PacBio	https://ftp.ncbi.nlm.nih.gov/genomes/refseq/bacteria/Streptomyces_albus/all_assembly_versions/GCF_003675345.1_ASM367534v1
GID56	Streptomyces alfalfae ACCC40021	rhizosphere	8625867	18	70	7065	71.9	1	0	2	36	64	33	12	PRJNA320684	GCF_001975025.1	SOAPdenovo v. 2.04; Celera Assembler v. 8.0; GapCloser v. 1.12	310.8x	Illumina; PacBio	https://ftp.ncbi.nlm.nih.gov/genomes/refseq/bacteria/Streptomyces_alfalfae/all_assembly_versions/GCF_001975025.1_ASM197502v1
GID33	Streptomyces ambofaciens ATCC 23877	soil	8393598	17	74	7194	71.9	1	1	6	27	34	42	6	PRJNA93	GCF_001267885.1	CLC workbench v 7.0.3	114x	Illumina	https://ftp.ncbi.nlm.nih.gov/genomes/refseq/bacteria/Streptomyces_ambofaciens/all_assembly_versions/GCF_001267885.1_ASM126788v1
GID42	Streptomyces ambofaciens DSM 40697	soil	8137876	18	68	6900	72.1	1	0		26	34	27	6	PRJNA298666	GCF_001632865.1	CLC workbench v 7.0.3	___	Illumina	https://ftp.ncbi.nlm.nih.gov/genomes/refseq/bacteria/Streptomyces_ambofaciens/all_assembly_versions/GCF_001632865.1_ASM163286v1
GID94	Streptomyces atratus SCSIO_ZH16	marine	9641288	18	76	7709	69.5	1	0	2	26	41	17	5	PRJNA436062	GCF_003330865.1	SOAPdenovo v. 3.9.0	150.0x	PacBio	https://ftp.ncbi.nlm.nih.gov/genomes/refseq/bacteria/Streptomyces_atratus/all_assembly_versions/GCF_003330865.1_ASM333086v1
GID57	Streptomyces autolyticus CGMCC0516	soil	10184660	18	69	7702	70.9	1	0	6	48	65	20	5	PRJNA360354	GCF_001983975.1	SMRT Portal v. 2.3.0	279x	Illumina; PacBio	https://ftp.ncbi.nlm.nih.gov/genomes/refseq/bacteria/Streptomyces_autolyticus/all_assembly_versions/GCF_001983975.1_ASM198397v1
GID1	Streptomyces avermitilis MA-4680	soil	9119895	18	68	7445	70.6	1	1	7	36	50	46	11	PRJNA189	GCF_000009765.2	___	___	Sanger	https://ftp.ncbi.nlm.nih.gov/genomes/refseq/bacteria/Streptomyces_avermitilis/all_assembly_versions/GCF_000009765.2_ASM976v2
GID91	Streptomyces bacillaris ATCC 15855	soil	7888441	18	65	6370	71.9	1	0	3	31	44	24	2	PRJNA471017	GCF_003268675.1	GS De Novo Assembler v. Sep-2017	130.0x	PacBio	https://ftp.ncbi.nlm.nih.gov/genomes/refseq/bacteria/Streptomyces_bacillaris/all_assembly_versions/GCF_003268675.1_ASM326867v1
GID4	Streptomyces bingchenggensis BCW-1	soil	11936683	18	66	9262	70.6	1	0	6	50	77	21	11	PRJNA46847	GCF_000092385.1	___	___	454;Sanger	https://ftp.ncbi.nlm.nih.gov/genomes/refseq/bacteria/Streptomyces_bingchenggensis/all_assembly_versions/GCF_000092385.1_ASM9238v1
GID11	Streptomyces cattleya NRRL 8057	soil	8092553	18	67	6954	72.8	1	1	3	39	52	54	8	PRJNA65103	GCF_000237305.1	___	12x Sanger, 13x 454	454;Sanger	https://ftp.ncbi.nlm.nih.gov/genomes/refseq/bacteria/Streptomyces_cattleya/all_assembly_versions/GCF_000237305.1_ASM23730v1
GID121	Streptomyces clavuligerus ATCC 27064	soil	8544086	18	70	6873	72	1	1	15	42	65	13	5	PRJNA414136	GCF_005519465.1	HGAP v. 2.3	50.0x	PacBio	https://ftp.ncbi.nlm.nih.gov/genomes/refseq/bacteria/Streptomyces_clavuligerus/all_assembly_versions/GCF_005519465.1_ASM551946v1
GID101	Streptomyces clavuligerus F1D-5	soil	8059125	18	79	6314	72.1	1	2	6	38	54	12	5	PRJNA488350	GCF_003454755.1	SOAPdenovo v. MAY-2018	320x	Illumina; PacBio	https://ftp.ncbi.nlm.nih.gov/genomes/refseq/bacteria/Streptomyces_clavuligerus/all_assembly_versions/GCF_003454755.1_ASM345475v1
GID46	Streptomyces clavuligerus F613-1	soil	7590758	18	69	6097	72.1	1	1	5	34	50	11	4	PRJNA329150	GCF_001693675.1	SPAdes Genome Assembler v. 3.8; HGAP v. 3	60x	Illumina; PacBio	https://ftp.ncbi.nlm.nih.gov/genomes/refseq/bacteria/Streptomyces_clavuligerus/all_assembly_versions/GCF_001693675.1_ASM169367v1
GID8	Streptomyces coelicolor A3(2)	soil	9054847	18	65	8152	71.9	1	2	3	29	37	22	5	PRJNA242	GCF_000203835.1	___	___	___	https://ftp.ncbi.nlm.nih.gov/genomes/refseq/bacteria/Streptomyces_coelicolor/all_assembly_versions/suppressed/GCF_000203835.1_ASM20383v1/
GID19	Streptomyces collinus Tu 365	soil	8337286	18	72	6979	72.4	1	2	1	32	50	45	8	PRJNA171216	GCF_000444875.1	Newbler v. 2.0.00.22	61.35x	454	https://ftp.ncbi.nlm.nih.gov/genomes/refseq/bacteria/Streptomyces_collinus/all_assembly_versions/GCF_000444875.1_ASM44487v1
GID27	Streptomyces cyaneogriseus noncyanogenus NMWT 1	soil	7762396	18	77	6227	72.6	1	0	1	33	48	42	6	PRJNA274645	GCF_000931445.1	SOAPdenovo v. 2	240x	Illumina	https://ftp.ncbi.nlm.nih.gov/genomes/refseq/bacteria/Streptomyces_cyaneogriseus/all_assembly_versions/GCF_000931445.1_ASM93144v1
GID81	Streptomyces dengpaensis XZHG99	soil	8710171	18	84	7414	70	1	2	5	24	31	19	5	PRJNA433056	GCF_002946835.1	___	114x	Illumina; PacBio	https://ftp.ncbi.nlm.nih.gov/genomes/refseq/bacteria/Streptomyces_dengpaensis/all_assembly_versions/GCF_002946835.1_ASM294683v1
GID120	Streptomyces exfoliatus A1013Y	soil	7646296	18	72	6731	71.6	1	0	1	23	25	18	1	PRJNA541061	GCF_005517195.1	SOAPdenovo v. july-2018	100x	Illumina	https://ftp.ncbi.nlm.nih.gov/genomes/refseq/bacteria/Streptomyces_exfoliatus/all_assembly_versions/GCF_005517195.1_ASM551719v1
GID72	Streptomyces formicae KY5	insect-associated	9611874	18	68	7952	71.4	1	0	3	39	60	34	8	PRJNA396953	GCF_002556545.1	HGAP v. 2.0; Newbler v. 2.3	56x	454; Illumina; PacBio	https://ftp.ncbi.nlm.nih.gov/genomes/refseq/bacteria/Streptomyces_formicae/all_assembly_versions/GCF_002556545.1_ASM255654v1
GID102	Streptomyces fradiae NKZ-259	soil	8081458	18	74	6721	72	1	0	9	35	56	29	7	PRJNA490068	GCF_003573485.1	HGAP v. 2.3	120x	PacBio	https://ftp.ncbi.nlm.nih.gov/genomes/refseq/bacteria/Streptomyces_fradiae/all_assembly_versions/GCF_003573485.1_ASM357348v1
GID17	Streptomyces fulvissimus DSM 40593	missing	7905758	18	73	6757	71.5	1	0	2	34	41	37	4	PRJNA192408	GCF_000385945.1	Newbler v. 2.5.3 (20101207_1124)	25x	454	https://ftp.ncbi.nlm.nih.gov/genomes/refseq/bacteria/Streptomyces_fulvissimus/all_assembly_versions/GCF_000385945.1_ASM38594v1
GID105	Streptomyces fungicidicus TXX3120	mammal-associated	7667496	18	74	6597	72.1	1	1	2	23	33	26	4	PRJNA406883	GCF_003665435.1	HGAP v. 2.0	500x	PacBio	https://ftp.ncbi.nlm.nih.gov/genomes/refseq/bacteria/Streptomyces_fungicidicus/all_assembly_versions/GCF_003665435.1_ASM366543v1
GID66	Streptomyces gilvosporeus F607	soil	8482298	18	71	7134	70.9	1	0	4	30	40	12	4	PRJNA374466	GCF_002082195.1	Newbler v. 2.8; HGAP v. MAR-2017	38.68x	Illumina; PacBio	https://ftp.ncbi.nlm.nih.gov/genomes/refseq/bacteria/Streptomyces_gilvosporeus/all_assembly_versions/GCF_002082195.1_ASM208219v1
GID22	Streptomyces glaucescens GLA.O	soil	7623774	18	69	6349	72.7	1	1	7	25	28	13	5	PRJNA260814	GCF_000761215.1	Newbler v. 2.8	___	Illumina	https://ftp.ncbi.nlm.nih.gov/genomes/refseq/bacteria/Streptomyces_glaucescens/all_assembly_versions/GCF_000761215.1_ASM76121v1
GID13	Streptomyces globisporus C-1027	soil	7783559	18	70	6640	71.5	1	2	5	30	40	20	1	PRJNA158251	GCF_000261345.2	SOAPdenovo v. 1.05	200x	Illumina	https://ftp.ncbi.nlm.nih.gov/genomes/refseq/bacteria/Streptomyces_globisporus/all_assembly_versions/GCF_000261345.2_ASM26134v2
GID87	Streptomyces globisporus TFH56	plant-associated	7666521	18	71	6369	71.6	1	2	2	28	37	20	0	PRJNA470782	GCF_003147545.1	Canu v. 1.7	37x	PacBio	https://ftp.ncbi.nlm.nih.gov/genomes/refseq/bacteria/Streptomyces_globisporus/all_assembly_versions/GCF_003147545.1_ASM314754v1
GID92	Streptomyces globosus soil	soil	7535750	21	75	6320	73.3	1	2	7	26	48	25	2	PRJNA428275	GCF_003325375.1	SMRT Portal v. 2.2.0	110x	PacBio	https://ftp.ncbi.nlm.nih.gov/genomes/refseq/bacteria/Streptomyces_globosus/all_assembly_versions/GCF_003325375.1_ASM332537v1
GID39	Streptomyces griseochromogenes ATCC 14511	soil	10764674	18	89	9025	70.8	1	0	1	48	83	40	6	PRJNA307132	GCF_001542625.1	SOAPdenovo v. unspecified	101x	PacBio	https://ftp.ncbi.nlm.nih.gov/genomes/refseq/bacteria/Streptomyces_griseochromogenes/all_assembly_versions/GCF_001542625.1_ASM154262v2
GID103	Streptomyces griseorubiginosus 3E-1	plant-associated	9512378	18	77	8159	71.1	1	0	4	25	30	19	5	PRJNA483085	GCF_003595235.1	HGAP v. v3.0	107x	PacBio	https://ftp.ncbi.nlm.nih.gov/genomes/refseq/bacteria/Streptomyces_griseorubiginosus/all_assembly_versions/GCF_003595235.1_ASM359523v1
GID116	Streptomyces griseoviridis F1-27	soil	8963414	18	69	7415	72.1	1	0	12	31	45	17	6	PRJNA511581	GCF_003994395.1	HGAP v. V4	143x	PacBio	https://ftp.ncbi.nlm.nih.gov/genomes/refseq/bacteria/Streptomyces_griseoviridis/all_assembly_versions/GCF_003994395.1_ASM399439v1
GID2	Streptomyces griseus griseus NBRC 13350	soil	8545929	18	66	6969	72	1	0	4	38	55	20	6	PRJDA20085	GCF_000010605.1	___	___	Sanger	https://ftp.ncbi.nlm.nih.gov/genomes/refseq/bacteria/Streptomyces_griseus/all_assembly_versions/GCF_000010605.1_ASM1060v1
GID12	Streptomyces hygroscopicus jinggangensis 5008	soil	10383684	18	68	8998	71.8	1	2	3	38	49	33	4	PRJNA81087	GCF_000245355.1	___	___	___	https://ftp.ncbi.nlm.nih.gov/genomes/refseq/bacteria/Streptomyces_hygroscopicus/all_assembly_versions/GCF_000245355.1_ASM24535v1
GID14	Streptomyces hygroscopicus jinggangensis TL01	engineered	10077952	18	68	8763	71.9	1	2	13	38	49	33	4	PRJNA169410	GCF_000340845.1	___	___	___	https://ftp.ncbi.nlm.nih.gov/genomes/refseq/bacteria/Streptomyces_hygroscopicus/all_assembly_versions/GCF_000340845.1_ASM34084v1
GID37	Streptomyces hygroscopicus limoneus KCTC 1717	soil	10537932	18	83	8851	71.8	2	0	1	34	44	29	2	PRJNA302679	GCF_001447075.1	SMRT Portal v. 2.3.0	144x	PacBio	https://ftp.ncbi.nlm.nih.gov/genomes/refseq/bacteria/Streptomyces_hygroscopicus/all_assembly_versions/GCF_001447075.1_ASM144707v1
GID62	Streptomyces hygroscopicus XM201	soil	12012215	18	73	9385	70.6	1	0	4	51	67	23	8	PRJNA350243	GCF_002021875.1	SPAdes v. 3.5.0	___	Illumina	https://ftp.ncbi.nlm.nih.gov/genomes/refseq/bacteria/Streptomyces_hygroscopicus/all_assembly_versions/GCF_002021875.1_ASM202187v1
GID99	Streptomyces koyangensis VK-A60T	soil	7220839	21	66	5988	72.9	1	0	17	21	32	28	6	PRJNA486241	GCF_003428925.1	HGAP v. 2.3	120x	PacBio	https://ftp.ncbi.nlm.nih.gov/genomes/refseq/bacteria/Streptomyces_koyangensis/all_assembly_versions/GCF_003428925.1_ASM342892v1
GID74	Streptomyces lavendulae lavendulae CCM 3239	soil	8932792	21	81	7608	72.5	1	1	6	28	40	17	6	PRJNA407779	GCF_002803845.1	Newbler v. 2.8	172x	Illumina	https://ftp.ncbi.nlm.nih.gov/genomes/refseq/bacteria/Streptomyces_lavendulae/all_assembly_versions/GCF_002803845.1_ASM280384v1
GID32	Streptomyces leeuwenhoekii DSM 42122	soil	8122491	19	72	6671	72.3	1	2	7	33	48	32	5	PRJEB8583	GCF_001013905.1	___	120x	___	https://ftp.ncbi.nlm.nih.gov/genomes/refseq/bacteria/Streptomyces_leeuwenhoekii/all_assembly_versions/GCF_001013905.1_sleC34
GID95	Streptomyces lincolnensis LC-G	missing	9513637	18	77	8163	71.1	1	0	1	30	37	27	5	PRJNA335896	GCF_003344445.1	phred/phrap/consed v. unspecified	19x	454	https://ftp.ncbi.nlm.nih.gov/genomes/refseq/bacteria/Streptomyces_lincolnensis/all_assembly_versions/GCF_003344445.1_ASM334444v1
GID45	Streptomyces lincolnensis NRRL 2936	soil	10319054	18	77	8815	71.1	1	0		34	42	34	7	PRJNA327477	GCF_001685355.1	phred/phrap/consed v. unspecified	26x	454	https://ftp.ncbi.nlm.nih.gov/genomes/refseq/bacteria/Streptomyces_lincolnensis/all_assembly_versions/GCF_001685355.1_ASM168535v1
GID21	Streptomyces lividans TK24	soil	8345283	18	78	7411	72.2	1	0	1	27	33	35	5	PRJNA257077	GCF_000739105.1	Newbler v. 2.8	189.4x	454; Illumina; Sanger	https://ftp.ncbi.nlm.nih.gov/genomes/refseq/bacteria/Streptomyces_lividans/all_assembly_versions/GCF_000739105.1_ASM73910v1
GID83	Streptomyces lunaelactis MM109	soil	8570191	18	77	7148	69.8	1	2	1	28	37	24	6	PRJNA430192	GCF_003054555.1	Canu v. 1.5	193.7x	Illumina; Oxford Nanopore	https://ftp.ncbi.nlm.nih.gov/genomes/refseq/bacteria/Streptomyces_lunaelactis/all_assembly_versions/GCF_003054555.1_ASM305455v1
GID114	Streptomyces luteoverticillatus CGMCC 15060	marine	7367863	21	83	6120	71.9	1	0		39	56	24	7	PRJNA510286	GCF_003970715.1	HGAP v. 2.3	247x	PacBio	https://ftp.ncbi.nlm.nih.gov/genomes/refseq/bacteria/Streptomyces_luteoverticillatus/all_assembly_versions/GCF_003970715.1_ASM397071v1
GID48	Streptomyces lydicus 103	soil	8201357	21	73	6938	72.1	1	0	4	25	38	12	5	PRJNA341548	GCF_001729485.1	SMRT Portal v. 2.3.0	100x	PacBio	https://ftp.ncbi.nlm.nih.gov/genomes/refseq/bacteria/Streptomyces_lydicus/all_assembly_versions/GCF_001729485.1_ASM172948v1
GID29	Streptomyces lydicus A02	soil	9307519	18	73	7837	70.6	1	0	2	36	47	12	6	PRJNA222592	GCF_000952035.2	SOAPdenovo v 2.0	270x	Illumina	https://ftp.ncbi.nlm.nih.gov/genomes/refseq/bacteria/Streptomyces_lydicus/all_assembly_versions/GCF_000952035.2_ASM95203v2
GID58	Streptomyces lydicus GS93/23	soil	8243179	21	70	6946	71.9	1	0	2	26	37	15	5	PRJNA363007	GCF_001984445.1	PacBio v. jan-2016	200x	Illumina; PacBio	https://ftp.ncbi.nlm.nih.gov/genomes/refseq/bacteria/Streptomyces_lydicus/all_assembly_versions/GCF_001984445.1_ASM198444v1
GID115	Streptomyces lydicus WYEC 108	soil	9125666	21	69	7356	70.6	1	0	1	34	52	17	3	PRJNA451474	GCF_003994375.1	HGAP v. 4	65x	PacBio	https://ftp.ncbi.nlm.nih.gov/genomes/refseq/bacteria/Streptomyces_lydicus/all_assembly_versions/GCF_003994375.1_ASM399437v1
GID73	Streptomyces malaysiensis DSM 4137	soil	10744231	18	67	8179	70.9	1	1	4	45	68	21	6	PRJNA396489	GCF_002591335.1	phred/phrap v. 2012-12-24	100x	454; Illumina; Sanger	https://ftp.ncbi.nlm.nih.gov/genomes/refseq/bacteria/Streptomyces_malaysiensis/all_assembly_versions/GCF_002591335.1_ASM259133v1
GID84	Streptomyces nigra 452	marine	7641029	18	77	6695	71.9	1	0	1	20	24	23	4	PRJNA451055	GCF_003074055.1	ABySS v. 1.5.2	300x	Illumina	https://ftp.ncbi.nlm.nih.gov/genomes/refseq/bacteria/Streptomyces_nigra/all_assembly_versions/GCF_003074055.1_ASM307405v1
GID61	Streptomyces niveus SCSIO 3406	marine	7990492	18	72	6690	70.4	1	0	7	29	40	25	3	PRJNA328345	GCF_002009175.1	denovo v v2.04	315.48x	Illumina	https://ftp.ncbi.nlm.nih.gov/genomes/refseq/bacteria/Streptomyces_niveus/all_assembly_versions/GCF_002009175.1_ASM200917v1
GID52	Streptomyces olivaceus KLBMP 5084	plant-associated	8180260	18	66	6487	72.2	1	0		34	48	29	1	PRJNA331053	GCF_001767375.1	HGAP v. 2.3	200x	PacBio	https://ftp.ncbi.nlm.nih.gov/genomes/refseq/bacteria/Streptomyces_olivaceus/all_assembly_versions/GCF_001767375.1_ASM176737v1
GID98	Streptomyces olivoreticuli olivoreticuli ATCC 31159	soil	8809793	21	81	7102	71	1	0	8	40	71	30	3	PRJNA484511	GCF_003391135.1	SMRT Portal v. 5.1.0	145x	Illumina; PacBio	https://ftp.ncbi.nlm.nih.gov/genomes/refseq/bacteria/Streptomyces_olivoreticuli/all_assembly_versions/GCF_003391135.1_ASM339113v1
GID59	Streptomyces pactum ACT 12	soil	8550793	18	67	6934	71.8	1	0	2	30	46	36	5	PRJNA374492	GCF_002005225.1	SMRT Portal v. 2.3.0	50x	PacBio	https://ftp.ncbi.nlm.nih.gov/genomes/refseq/bacteria/Streptomyces_pactum/all_assembly_versions/GCF_002005225.1_ASM200522v1
GID44	Streptomyces parvulus 2297	soil	7766531	18	68	6784	72.7	1	1		22	30	27	1	PRJNA320204	GCF_001660045.1	SPAdes v. 3.5.0	253x	Illumina; PacBio	https://ftp.ncbi.nlm.nih.gov/genomes/refseq/bacteria/Streptomyces_parvulus/all_assembly_versions/GCF_001660045.1_ASM166004v1
GID24	Streptomyces pluripotens MUSC 137	plant-associated	7586568	76	18	6206	69.9	1	0	2	30	36	31	2	PRJNA261098	GCF_000816465.3	SMRT Portal (HGAP3) v. MAR-2017	217.4x	PacBio	https://ftp.ncbi.nlm.nih.gov/genomes/refseq/bacteria/Streptomyces_pluripotens/all_assembly_versions/GCF_000816465.3_ASM81646v4
GID6	Streptomyces pratensis ATCC 33331	soil	7656104	18	69	6518	70.9	1	2	4	27	33	22	3	PRJNA33771	GCF_000176115.2	Newbler v 2.3	30x	454; Illumina	https://ftp.ncbi.nlm.nih.gov/genomes/refseq/bacteria/Streptomyces_pratensis/all_assembly_versions/GCF_000176115.2_ASM17611v2
GID34	Streptomyces pristinaespiralis HCCB 10218	soil	8532592	18	71	7078	71.3	1	0	3	23	41	21	9	PRJNA281980	GCF_001278075.1	SPAdes v. 3.1.1	320x	Illumina; PacBio	https://ftp.ncbi.nlm.nih.gov/genomes/refseq/bacteria/Streptomyces_pristinaespiralis/all_assembly_versions/GCF_001278075.1_ASM127807v1
GID49	Streptomyces puniciscabiei TW1S1	soil	9698948	18	73	7950	71.1	1	0	5	33	52	37	10	PRJNA338069	GCF_001735805.1	HGAP Assembly v. 3.0	67x	PacBio	https://ftp.ncbi.nlm.nih.gov/genomes/refseq/bacteria/Streptomyces_fodineus/all_assembly_versions/GCF_001735805.1_ASM173580v1
GID41	Streptomyces qaidamensis S10	soil	9083372	18	74	7702	71.3	1	0	3	28	34	20	5	PRJNA316940	GCF_001611795.1	SMRT Portal v. 2.3.0	278x	Illumina; PacBio	https://ftp.ncbi.nlm.nih.gov/genomes/refseq/bacteria/Streptomyces_qaidamensis/all_assembly_versions/GCF_001611795.1_ASM161179v1
GID50	Streptomyces rubrolavendulae MJM4426	soil	6543262	18	65	5225	74	1	0	2	25	32	8	4	PRJNA317020	GCF_001750785.1	HGAP v.3	92x	PacBio	https://ftp.ncbi.nlm.nih.gov/genomes/refseq/bacteria/Streptomyces_rubrolavendulae/all_assembly_versions/GCF_001750785.1_ASM175078v1
GID47	Streptomyces sampsonii KJ40	rhizosphere	7070328	17	91	5917	73.3	1	0	10	21	31	33	4	PRJNA336086	GCF_001704195.1	SMRT Portal v. 2.3.0	88.5x	Illumina; PacBio	https://ftp.ncbi.nlm.nih.gov/genomes/refseq/bacteria/Streptomyces_sampsonii/all_assembly_versions/GCF_001704195.1_ASM170419v1
GID3	Streptomyces scabiei 87.22	soil	10148695	18	75	8452	71.4	1	0		34	44	15	5	PRJEA40749	GCF_000091305.1	___	___	___	https://ftp.ncbi.nlm.nih.gov/genomes/refseq/bacteria/Streptomyces_scabiei/all_assembly_versions/GCF_000091305.1_ASM9130v1
GID118	Streptomyces seoulensis KCTC 9819	soil	6426245	18	67	5660	71.9	1	1	3	24	29	26	2	PRJNA486883	GCF_004328625.1	HGAP v. 3.0	215.88x	PacBio	https://ftp.ncbi.nlm.nih.gov/genomes/refseq/bacteria/Streptomyces_seoulensis/all_assembly_versions/GCF_004328625.1_ASM432862v1
GID104	Streptomyces sp. 11-1-2	plant-associated	11655206	18	74	9035	70.7	1	1	5	48	64	21	5	PRJNA393858	GCF_003595545.1	HGAP v. July-2016	230x	PacBio	https://ftp.ncbi.nlm.nih.gov/genomes/refseq/bacteria/Streptomyces_sp._11-1-2/all_assembly_versions/GCF_003595545.1_ASM359554v1
GID63	Streptomyces sp. 3211	soil	8991292	21	81	7619	71.6	1	2	4	39	52	21	6	PRJNA377638	GCF_002028385.1	PacBio v. jan-2016	200x	Illumina; PacBio	https://ftp.ncbi.nlm.nih.gov/genomes/refseq/bacteria/Streptomyces_sp._3211/all_assembly_versions/GCF_002028385.1_ASM202838v1
GID23	Streptomyces sp. 769	soil	10338286	21	71	8411	71.4	1	1	10	41	64	24	8	PRJNA182073	GCF_000816025.1	___	___	___	https://ftp.ncbi.nlm.nih.gov/genomes/refseq/bacteria/Streptomyces_sp._769/all_assembly_versions/GCF_000816025.1_ASM81602v1
GID97	Streptomyces sp. CB09001	soil	7787608	18	70	6794	71.9	1	0	2	22	33	23	6	PRJNA433315	GCF_003369795.1	Celera Assembler v. 8.1	12x	Illumina; PacBio	https://ftp.ncbi.nlm.nih.gov/genomes/refseq/bacteria/Streptomyces_sp._CB09001/all_assembly_versions/GCF_003369795.1_ASM336979v1
GID100	Streptomyces sp. CC0208	marine	9320089	18	72	8015	70.7	1	0	5	26	37	21	7	PRJNA488148	GCF_003443735.1	SMRT Portal v. 5.1.0	111x	Illumina; PacBio	https://ftp.ncbi.nlm.nih.gov/genomes/refseq/bacteria/Streptomyces_sp._CC0208/all_assembly_versions/GCF_003443735.1_ASM344373v1
GID38	Streptomyces sp. CdTB01	soil	10191567	18	74	8837	71.6	1	1	3	35	43	31	7	PRJNA302338	GCF_001484565.1	Celera Assembler v. 8.2	52.04x	PacBio	https://ftp.ncbi.nlm.nih.gov/genomes/refseq/bacteria/Streptomyces_sp._CdTB01/all_assembly_versions/GCF_001484565.1_ASM148456v1
GID35	Streptomyces sp. CFMR 7	plant-associated	8307279	18	66	6832	71.9	1	1	10	39	54	39	6	PRJNA282459	GCF_001278095.1	HGAP v. 3	147x	PacBio	https://ftp.ncbi.nlm.nih.gov/genomes/refseq/bacteria/Streptomyces_sp._CFMR_7/all_assembly_versions/GCF_001278095.1_ASM127809v1
GID71	Streptomyces sp. CLI2509	fungus-associated	7232701	18	68	5841	73.1	1	1	7	18	23	26	2	PRJNA384988	GCF_002288075.1	HGAP v. 04-08-2015	253x	PacBio	https://ftp.ncbi.nlm.nih.gov/genomes/refseq/bacteria/Streptomyces_sp._CLI2509/all_assembly_versions/GCF_002288075.1_ASM228807v1
GID31	Streptomyces sp. CNQ-509	marine	8039333	15	59	6517	72.9	1	0	5	29	44	31	4	PRJNA284218	GCF_001011035.1	Newbler v. 2.8	87.7x	454; Illumina	https://ftp.ncbi.nlm.nih.gov/genomes/refseq/bacteria/Streptomyces_sp._CNQ-509/all_assembly_versions/GCF_001011035.1_ASM101103v1
GID77	Streptomyces sp. DUT11	marine	8027164	18	67	5424	71.4	1	0	5	32	43	21	4	PRJNA351245	GCF_002848525.1	Canu v. 1.5	200x	PacBio	https://ftp.ncbi.nlm.nih.gov/genomes/refseq/bacteria/Streptomyces_sp._DUT11/all_assembly_versions/suppressed/GCF_002848525.1_ASM284852v1/
GID117	Streptomyces sp. endophyte_N2	plant-associated	8428700	21	79	7054	71.8	1	0	5	34	57	52	7	PRJNA448806	GCF_004104485.1	HGAP v. 3	131.87x	PacBio	https://ftp.ncbi.nlm.nih.gov/genomes/refseq/bacteria/Streptomyces_sp._endophyte_N2/all_assembly_versions/GCF_004104485.1_ASM410448v1
GID60	Streptomyces sp. fd1-xmd	soil	7929999	21	77	6727	72.3	1	0		27	35	17	3	PRJNA374669	GCF_002007685.1	HGAP v. Feb-2014	148x	PacBio	https://ftp.ncbi.nlm.nih.gov/genomes/refseq/bacteria/Streptomyces_sp._fd1-xmd/all_assembly_versions/GCF_002007685.1_ASM200768v1
GID36	Streptomyces sp. FR-008	engineered	7258031	21	68	5957	73.1	1	2	15	21	28	27	1	PRJNA264353	GCF_001431765.1	HGAP v. 3	200x	Illumina; PacBio	https://ftp.ncbi.nlm.nih.gov/genomes/refseq/bacteria/Streptomyces_sp._FR-008/all_assembly_versions/GCF_001431765.1_ASM143176v1
GID112	Streptomyces sp. GGCR-6	plant-associated	10393987	18	77	9089	71	1	0		32	41	27	8	PRJNA508841	GCF_003955715.1	HGAP v. 2.3	120x	PacBio	https://ftp.ncbi.nlm.nih.gov/genomes/refseq/bacteria/Streptomyces_aquilus/all_assembly_versions/GCF_003955715.1_ASM395571v1/
GID93	Streptomyces sp. Go-475	soil	8570609	18	71	7335	72	1	0	2	31	43	36	10	PRJNA430025	GCF_003330845.1	Newbler v. 2.8; Canu v. 1.6	76.4x	Illumina; Oxford Nanopore	https://ftp.ncbi.nlm.nih.gov/genomes/refseq/bacteria/Streptomyces_sp._Go-475/all_assembly_versions/GCF_003330845.1_ASM333084v1
GID96	Streptomyces sp. GSSD-12	soil	8454852	18	67	6815	71.2	1	0	5	30	46	13	4	PRJNA482168	GCF_003344965.1	HGAP v 2.3	120x	PacBio	https://ftp.ncbi.nlm.nih.gov/genomes/refseq/bacteria/Streptomyces_paludis/all_assembly_versions/GCF_003344965.1_ASM334496v1/
GID111	Streptomyces sp. KPB2	plant-associated	8082236	18	70	6947	72.2	1	0	2	24	28	23	1	PRJNA487680	GCF_003950055.1	HGAP v. 3	8x	PacBio	https://ftp.ncbi.nlm.nih.gov/genomes/refseq/bacteria/Streptomyces_sp._KPB2/all_assembly_versions/GCF_003950055.1_ASM395005v1
GID75	Streptomyces sp. M56	insect-associated	11742376	18	71	8923	70.8	1	0	9	47	71	25	7	PRJNA392941	GCF_002812405.1	HGAP v aug-2014	94x	PacBio	https://ftp.ncbi.nlm.nih.gov/genomes/refseq/bacteria/Streptomyces_sp._M56/all_assembly_versions/GCF_002812405.1_ASM281240v1
GID18	Streptomyces sp. Mg1	soil	8716193	21	73	7346	72	1	3	14	32	43	11	2	PRJNA207881	GCF_000412265.2	Celera Assembler v. 8.2	80x illumina; 30x PacBio	Illumina; PacBio	https://ftp.ncbi.nlm.nih.gov/genomes/refseq/bacteria/Streptomyces_sp._Mg1/all_assembly_versions/GCF_000412265.2_ASM41226v2
GID113	Streptomyces sp. MK-45	soil	10677137	18	71	8907	70.7	1	0		34	45	37	6	PRJNA509702	GCF_003963535.1	HGAP v. 2.3	120x	PacBio	https://ftp.ncbi.nlm.nih.gov/genomes/refseq/bacteria/Streptomyces_cyaneochromogenes/all_assembly_versions/GCF_003963535.1_ASM396353v1/
GID67	Streptomyces sp. MOE7	soil	8399509	21	68	6823	71.8	1	0	4	25	37	16	5	PRJNA368919	GCF_002090335.1	Celera Assembler v. 8.1	180x	PacBio	https://ftp.ncbi.nlm.nih.gov/genomes/refseq/bacteria/Streptomyces_sp._MOE7/all_assembly_versions/GCF_002090335.1_ASM209033v1
GID88	Streptomyces sp. NEAU-S7GS2	soil	9687439	21	71	7864	70.6	1	1	2	34	55	19	4	PRJNA471769	GCF_003173275.1	SMRT Portal v. 5.0.1	64x	PacBio	https://ftp.ncbi.nlm.nih.gov/genomes/refseq/bacteria/Streptomyces_sp._NEAU-S7GS2/all_assembly_versions/GCF_003173275.1_ASM317327v1
GID82	Streptomyces sp. P3	soil	9851971	18	79	8043	71.3	1	0	2	34	45	22	7	PRJNA437360	GCF_003032475.1	___	98.2x	PacBio	https://ftp.ncbi.nlm.nih.gov/genomes/refseq/bacteria/Streptomyces_sp._P3/all_assembly_versions/GCF_003032475.1_ASM303247v1
GID16	Streptomyces sp. PAMC26508	lichen-associated	7630245	18	67	6462	70.9	1	1	7	28	35	23	3	PRJNA182709	GCF_000364805.1	___	___	___	https://ftp.ncbi.nlm.nih.gov/genomes/refseq/bacteria/Streptomyces_sp._PAMC_26508/all_assembly_versions/GCF_000364805.1_ASM36480v1
GID76	Streptomyces sp. S063	marine	7614683	18	70	6099	71.4	1	0	3	28	36	20	3	PRJNA388536	GCF_002832675.1	Canu v. 1.4	150x	PacBio	https://ftp.ncbi.nlm.nih.gov/genomes/refseq/bacteria/Streptomyces_sp._S063/all_assembly_versions/GCF_002832675.1_ASM283267v1
GID68	Streptomyces sp. S8	soil	7601864	18	69	6251	72.1	1	1	12	33	47	33	4	PRJNA318942	GCF_002094995.1	HGAP v. 3	25x	PacBio	https://ftp.ncbi.nlm.nih.gov/genomes/refseq/bacteria/Streptomyces_sp._S8/all_assembly_versions/GCF_002094995.1_ASM209499v1
GID43	Streptomyces sp. SAT1	plant-associated	7472530	18	71	6158	73	1	0	7	27	37	28	4	PRJNA321638	GCF_001654495.1	SMRT Portal v. 2.3.0	89x	PacBio	https://ftp.ncbi.nlm.nih.gov/genomes/refseq/bacteria/Streptomyces_sp._SAT1/all_assembly_versions/GCF_001654495.1_ASM165449v1
GID64	Streptomyces sp. Sge12	soil	8110698	21	74	6982	72.1	1	1	2	37	48	17	6	PRJNA380743	GCF_002080455.1	HGAP Assembly v. 3; BWA v. 0.7.10; Bowtie v. 2	85x	Illumina; PacBio	https://ftp.ncbi.nlm.nih.gov/genomes/refseq/bacteria/Streptomyces_sp._Sge12/all_assembly_versions/GCF_002080455.1_ASM208045v1
GID78	Streptomyces sp. SM17	marine	7179914	21	69	6039	73.2	1	3	24	20	27	33	3	PRJNA384120	GCF_002910725.2	Canu v. 1.7	194x	PacBio	https://ftp.ncbi.nlm.nih.gov/genomes/refseq/bacteria/Streptomyces_sp._SM17/all_assembly_versions/GCF_002910725.2_ASM291072v2
GID79	Streptomyces sp. SM18	marine	7703166	18	76	6455	71.6	1	0	9	26	37	30	5	PRJNA384120	GCF_002910775.2	Canu v. 1.7	101x	PacBio	https://ftp.ncbi.nlm.nih.gov/genomes/refseq/bacteria/Streptomyces_sp._SM18/all_assembly_versions/GCF_002910775.2_ASM291077v2
GID119	Streptomyces sp. SS52	plant-associated	8184045	18	71	6843	72.3	1	0	5	28	32	34	2	PRJNA530858	GCF_004795715.1	Canu v. 1.7	156x	Illumina; PacBio	https://ftp.ncbi.nlm.nih.gov/genomes/refseq/bacteria/Streptomyces_sp._SS52/all_assembly_versions/GCF_004795715.1_ASM479571v1
GID7	Streptomyces sp. Sv. ACTE SirexAA-E	insect-associated	7414440	19	63	6318	71.6	1	0		22	30	18	6	PRJNA38225	GCF_000177195.2	Newbler v. 2.3	30x	454; Illumina	https://ftp.ncbi.nlm.nih.gov/genomes/refseq/bacteria/Streptomyces_sp._SirexAA-E/all_assembly_versions/GCF_000177195.2_ASM17719v2
GID55	Streptomyces sp. TN58	soil	7585034	21	75	6532	72.1	1	0	3	27	38	13	5	PRJNA354687	GCF_001941845.1	HGAP v. SEPTEMBER-2016	137x	Illumina; PacBio	https://ftp.ncbi.nlm.nih.gov/genomes/refseq/bacteria/Streptomyces_sp._TN58/all_assembly_versions/GCF_001941845.1_ASM194184v1
GID9	Streptomyces sp. Tu6071	soil	7506727	18	73	6223	72.8	1	1	22	19	25	27	2	PRJNA63579	GCF_000213055.1	Newbler v. 2.3	27x	454;Sanger	https://ftp.ncbi.nlm.nih.gov/genomes/refseq/bacteria/Streptomyces_sp._Tu6071/all_assembly_versions/GCF_000213055.1_ASM21305v1
GID54	Streptomyces sp. Tue6075	soil	7931832	18	69	6677	71.6	1	0	4	30	42	26	5	PRJNA273702	GCF_001931635.1	Newbler v. 2.8	103.9x	454; Illumina	https://ftp.ncbi.nlm.nih.gov/genomes/refseq/bacteria/Streptomyces_sp._Tue_6075/all_assembly_versions/GCF_001931635.1_ASM193163v1
GID109	Streptomyces sp. WAC 01438	soil	8201167	18	72	6864	71.8	1	1	4	21	29	23	3	PRJNA472056	GCF_003945525.1	HGAP v. NOV-2015	247x	PacBio	https://ftp.ncbi.nlm.nih.gov/genomes/refseq/bacteria/Streptomyces_sp._WAC_01438/all_assembly_versions/GCF_003945525.1_ASM394552v1
GID110	Streptomyces sp. WAC 01529	soil	8270461	18	72	6961	71.2	1	0	6	28	44	31	5	PRJNA472056	GCF_003945545.1	HGAP v. May-2016	202x	PacBio	https://ftp.ncbi.nlm.nih.gov/genomes/refseq/bacteria/Streptomyces_sp._WAC_01529/all_assembly_versions/GCF_003945545.1_ASM394554v1
GID108	Streptomyces sp. WAC 06738	soil	8324535	15	63	6755	72.9	1	0	1	22	34	9	3	PRJNA472056	GCF_003945505.1	HGAP v. Jun-2017	148x	PacBio	https://ftp.ncbi.nlm.nih.gov/genomes/refseq/bacteria/Streptomyces_sp._WAC_06738/all_assembly_versions/GCF_003945505.1_ASM394550v1
GID80	Streptomyces sp. WAC00288	soil	7852859	18	74	6685	72.7	1	4	11	25	32	9	1	PRJNA434467	GCF_002943895.1	PacBio v. MARCH 2016	1.0x	PacBio	https://ftp.ncbi.nlm.nih.gov/genomes/refseq/bacteria/Streptomyces_sp._WAC00288/all_assembly_versions/GCF_002943895.1_ASM294389v1
GID106	Streptomyces sp. Z022	soil	8157885	18	73	6407	71.8	1	1	9	33	46	32	6	PRJNA474356	GCF_003675325.1	FALCON v. version 0.3	213x	Illumina; PacBio	https://ftp.ncbi.nlm.nih.gov/genomes/refseq/bacteria/Streptomyces_sp._Z022/all_assembly_versions/GCF_003675325.1_ASM367532v1
GID90	Streptomyces sp. ZFG47	soil	10239272	18	75	8385	70.7	1	1	3	33	42	19	3	PRJNA475413	GCF_003261055.1	HGAP v. 1.3	120x	PacBio	https://ftp.ncbi.nlm.nih.gov/genomes/refseq/bacteria/Streptomyces_cadmiisoli/all_assembly_versions/GCF_003261055.1_ASM326105v1/
GID86	Streptomyces spongiicola HNM0071	marine	7180417	18	75	5669	71.8	1	0	13	27	38	19	5	PRJNA453635	GCF_003122365.1	ABySS v. 2.0	850x	Illumina; PacBio	https://ftp.ncbi.nlm.nih.gov/genomes/refseq/bacteria/Streptomyces_spongiicola/all_assembly_versions/GCF_003122365.1_ASM312236v1
GID85	Streptomyces tirandamycinicus HNM0039	marine	7289495	16	69	5939	72	1	0	11	30	42	23	4	PRJNA454035	GCF_003097515.1	ABySS v. 2.0	425x	Illumina; PacBio	https://ftp.ncbi.nlm.nih.gov/genomes/refseq/bacteria/Streptomyces_tirandamycinicus/all_assembly_versions/GCF_003097515.1_ASM309751v1
GID53	Streptomyces venezuelae NRRL B-65442	missing	8380320	21	77	7283	72.3	1	1	6	30	39	26	4	PRJNA353366	GCF_001886595.1	HGAP3 v. 1.87.139483	155x	PacBio	https://ftp.ncbi.nlm.nih.gov/genomes/refseq/bacteria/Streptomyces_venezuelae/all_assembly_versions/GCF_001886595.1_ASM188659v1
GID26	Streptomyces vietnamensis GIMV4.0001	soil	9153777	21	77	7850	72	1	1	12	31	41	26	7	PRJNA244969	GCF_000830005.1	SOAP de novo v. 2.21	286x	Illumina;Sanger	https://ftp.ncbi.nlm.nih.gov/genomes/refseq/bacteria/Streptomyces_vietnamensis/all_assembly_versions/GCF_000830005.1_ASM83000v1
GID65	Streptomyces violaceoruber S21	marine	7916045	18	73	6556	72.3	1	0	15	32	42	24	3	PRJNA374467	GCF_002082175.1	Newbler v. 2.8; HGAP v. MAR-2017	45x	Illumina; PacBio	https://ftp.ncbi.nlm.nih.gov/genomes/refseq/bacteria/Streptomyces_violaceoruber/all_assembly_versions/GCF_002082175.1_ASM208217v1
GID5	Streptomyces violaceusniger Tu 4113	soil	11138313	6	63	8726	70.7	1	2	5	46	62	26	4	PRJNA43031	GCF_000147815.2	Newbler v. 2.3	30x	454; Illumina	https://ftp.ncbi.nlm.nih.gov/genomes/refseq/bacteria/Streptomyces_violaceusniger/all_assembly_versions/GCF_000147815.2_ASM14781v3
GID30	Streptomyces xiamenensis 318	soil	5961402	15	59	5100	71.9	1	0	2	20	32	27	3	PRJNA73797	GCF_000993785.3	SOAPdenovo v. 2.04	382x	Illumina	https://ftp.ncbi.nlm.nih.gov/genomes/refseq/bacteria/Streptomyces_xiamenensis/all_assembly_versions/GCF_000993785.3_ASM99378v3
GID10	Streptomyces xinghaiensis S187	marine	7137891	18	69	5809	72.5	1	0	3	21	28	4	4	PRJNA67543	GCF_000220705.2	Canu v. 1.4	150x	454;PacBio	https://ftp.ncbi.nlm.nih.gov/genomes/refseq/bacteria/Streptomyces_xinghaiensis/all_assembly_versions/GCF_000220705.2_ASM22070v2
